# Supplementary material
Source: PubMed Central journal article supplement (PMC10227625)
Supplement: NIHMS1879600-supplement-Table_S1.pdf [file NIHMS1879600-supplement-Table_S1.pdf]

**Table S1**

**Supplemental Table 1: Diuretic Dosing Conversion**

|            |    |    |
|------------|----|----|
| Furosemide | 40 | PO |
| Furosemide | 20 | IV |
| Torsemide  | 20 | PO |
| Torsemide  | 20 | IV |
| Bumex      | 1  | PO |
| Bumex      | 1  | IV |

IV = intravenous, PO = per oral
