# Supplementary material
Source: PubMed Central journal article supplement (PMC10227625)

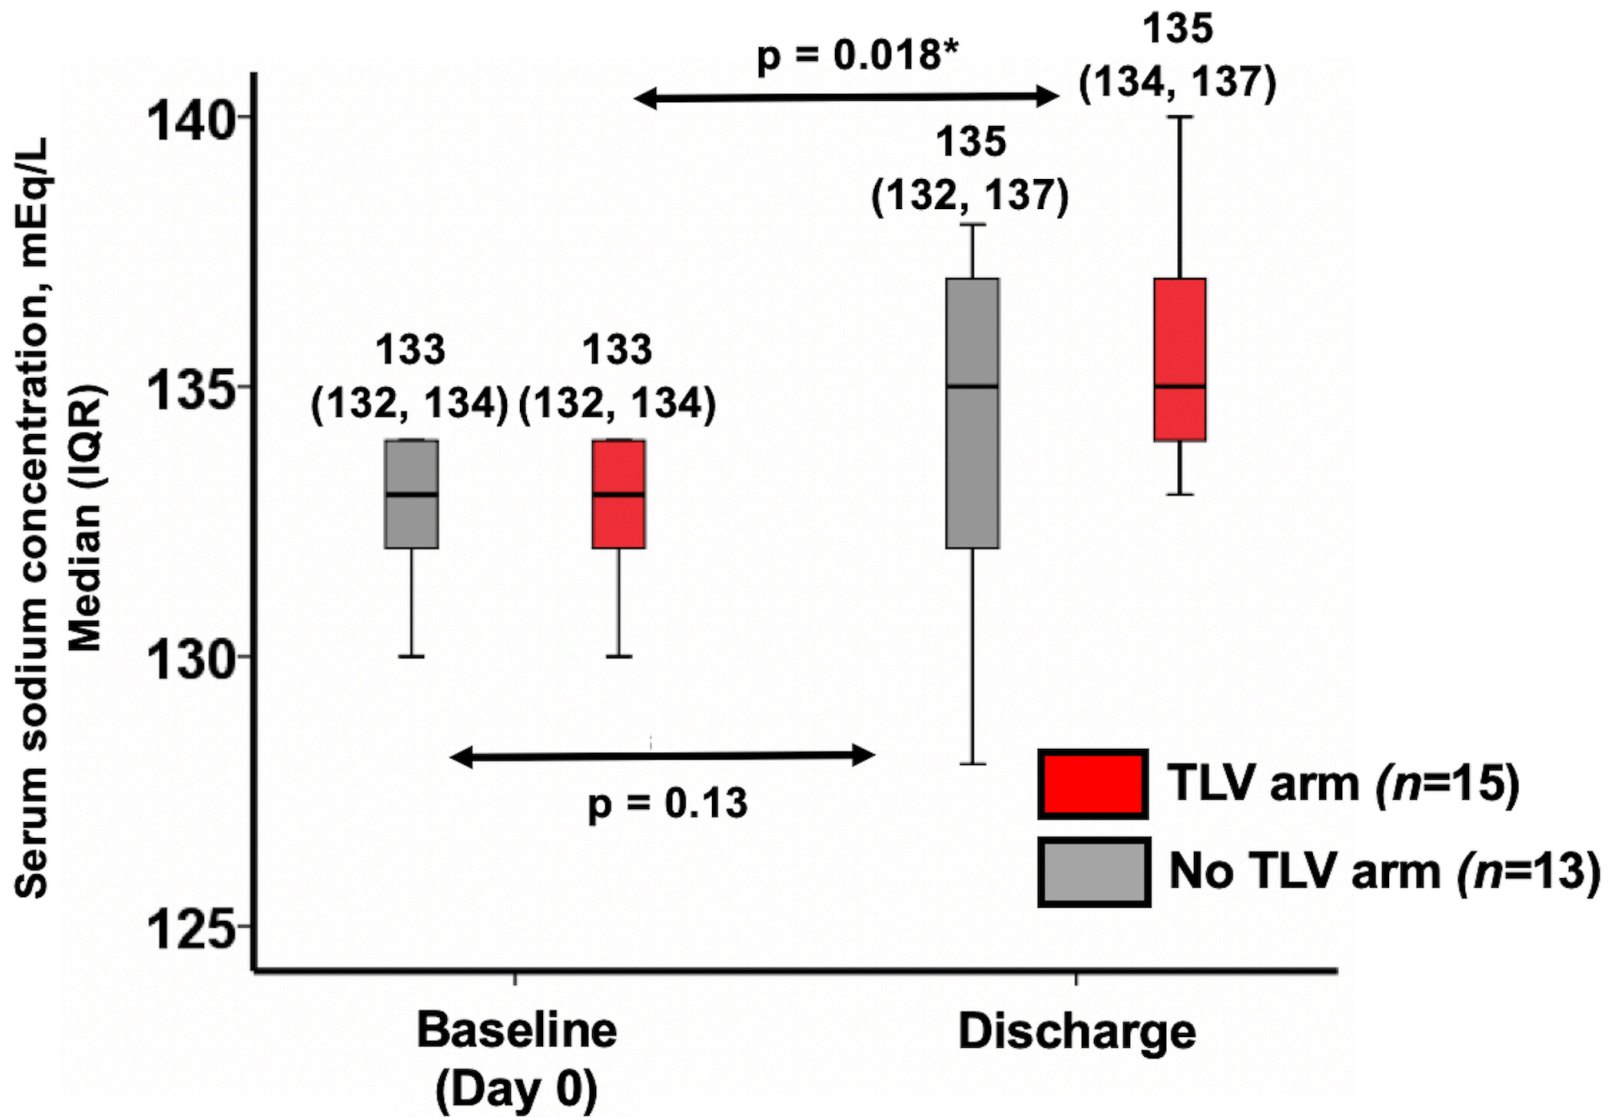

Supplement: NIHMS1879600-supplement-TOLVAD_SuppFig1.pdf [file NIHMS1879600-supplement-TOLVAD_SuppFig1.pdf]

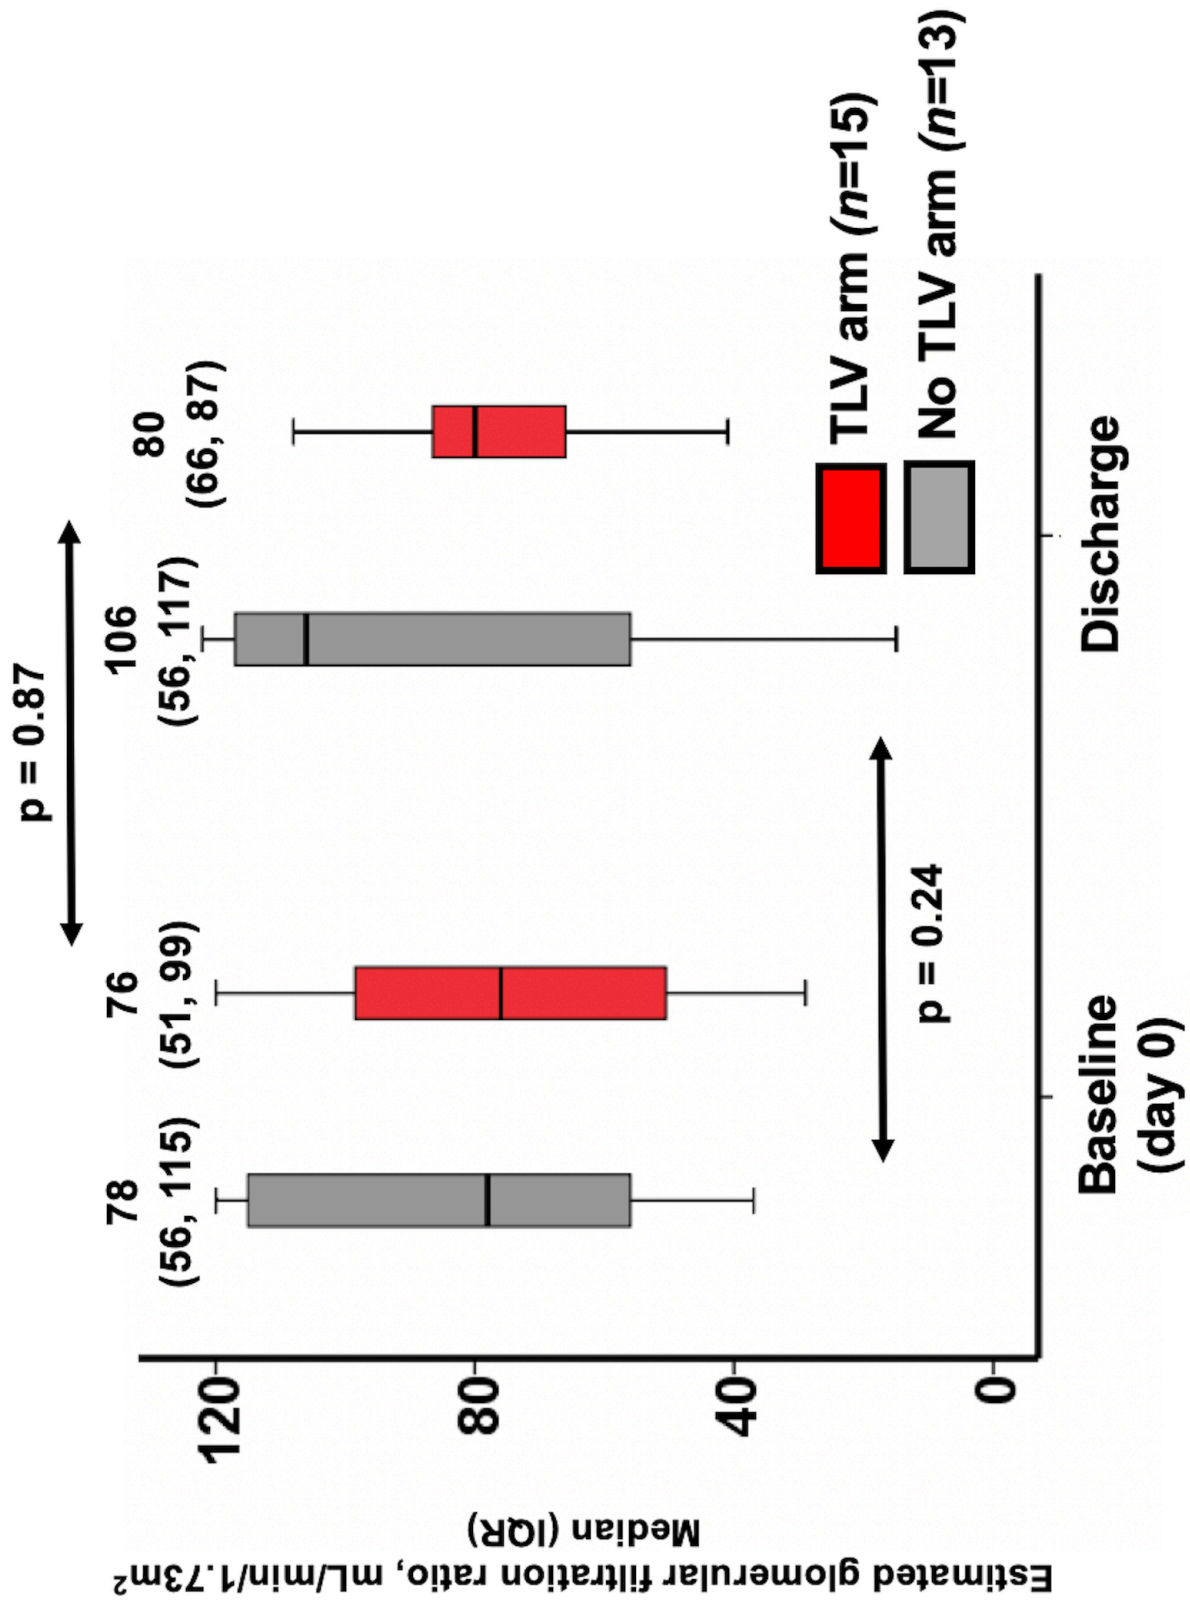

Supplement: NIHMS1879600-supplement-Tolvad_SuppFig2.pdf [file NIHMS1879600-supplement-Tolvad_SuppFig2.pdf]
